# Supplementary material for: BiTEMPS methacrylate dynamic covalent cross-linker providing rapid reprocessability and extrudability of covalent adaptable networks: high-yield synthesis with strong selectivity for disulfide linkages
Source: Royal Society of Chemistry journal article supplement (doi:10.1039/d4py00160e), 2024-01-01
Supplement: d4py00160e1.pdf [file d4py00160e1.pdf]

Supporting Information to

**BiTEMPS Methacrylate Dynamic Covalent Cross-linker**

**Providing Rapid Reprocessability and Extrudability of Covalent Adaptable Networks:**

**High-Yield Synthesis with Strong Selectivity for Disulfide Linkages**

Tapas Debsharma,<sup>a,+</sup> Nathan S. Purwanto,<sup>b,+</sup> Logan M. Fenimore,<sup>a</sup> Sarah Mitchell,<sup>c</sup>

Jayne Kennedy,<sup>c</sup> and John M. Torkelson<sup>a,b,\*</sup>

<sup>a</sup>Department of Chemical and Biological Engineering,

<sup>b</sup>Department of Materials Science and Engineering,

Northwestern University, Evanston, IL 60208, USA.

<sup>c</sup>Braskem America, 550 Technology Drive, Pittsburgh, PA 15219, USA

<sup>+</sup>co-first authors

<sup>\*</sup>Corresponding author, e-mail: [j-torkelson@northwestern.edu](mailto:j-torkelson@northwestern.edu)

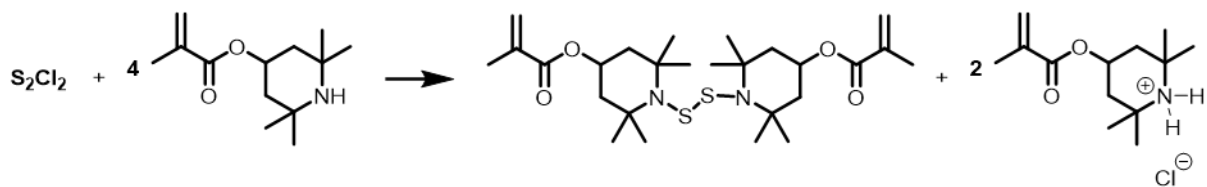

**Scheme S1.** Balanced equation for the synthesis of BTMA-S2.

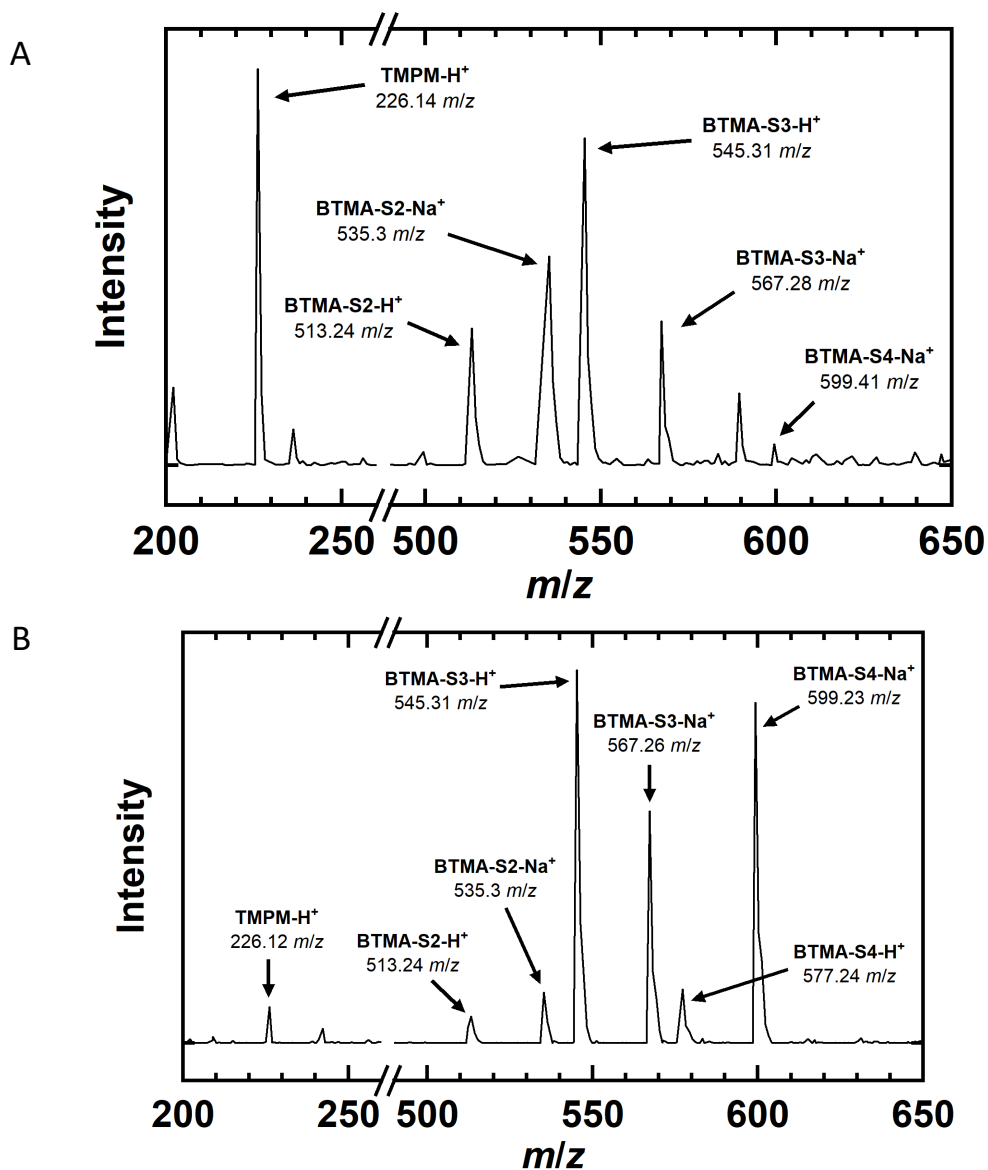

**Figure S1.** (A/B) ESI-MS spectra of BTMA-S<sub>n</sub> products from two different syntheses. In addition to the presence of disulfide (BTMA-S2), both spectra show the presence of protonated TMPM (TMPM-H<sup>+</sup>). One spectrum (B) clearly shows the presence of BTMA-S3 and BTMA-S4 while the other (A) clearly shows the presence of BTMA-S3, with a BTMA-S4 peak at slightly above noise level.

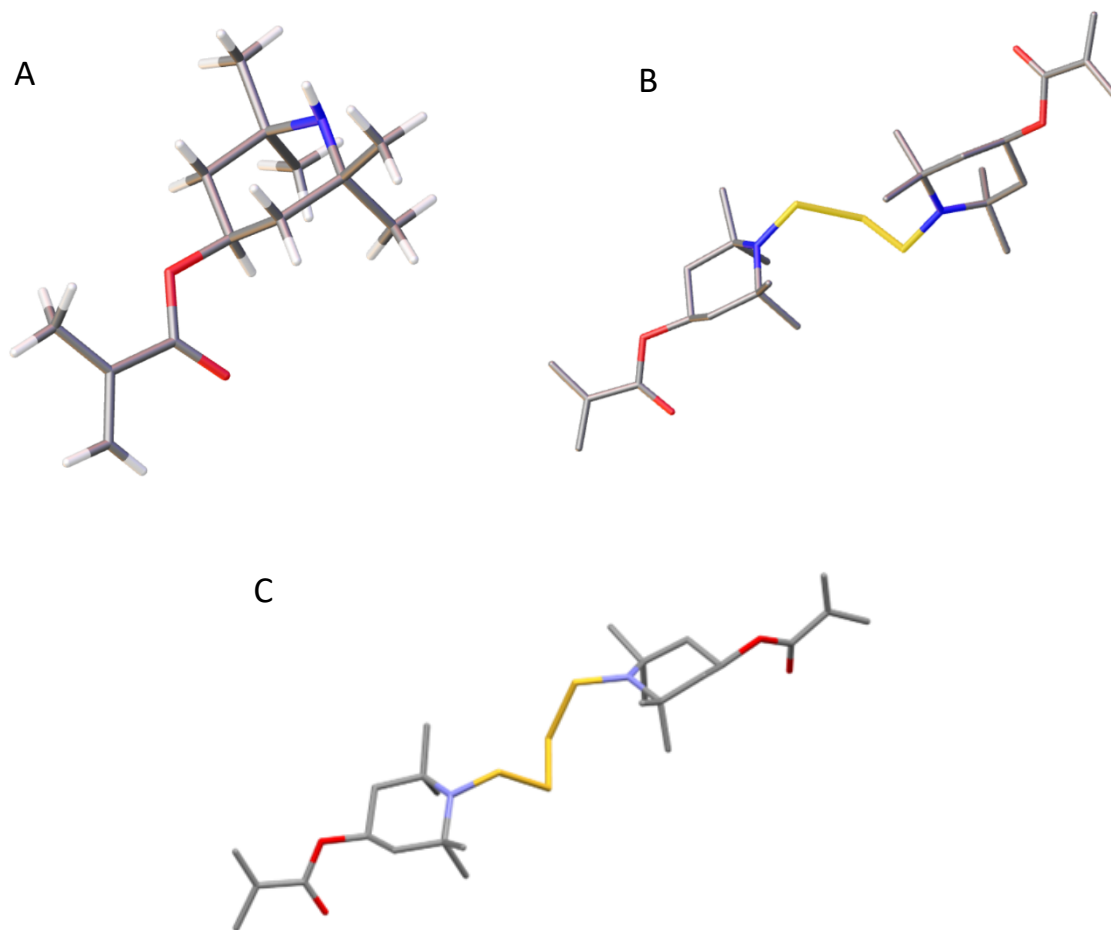

**Figure S2.** Unit cells of three crystals from BTMA-S<sub>n</sub> samples measured in single-crystal X-ray crystallography: (A) unreacted TPM, (B) BTMA-S3, (C) BTMA-S4. Grey, white, red, purple, and yellow represent carbon, hydrogen, oxygen, nitrogen, and sulfur atoms, respectively. Hydrogens were removed from BTMA-S3 and BTMA-S4 for clarity.

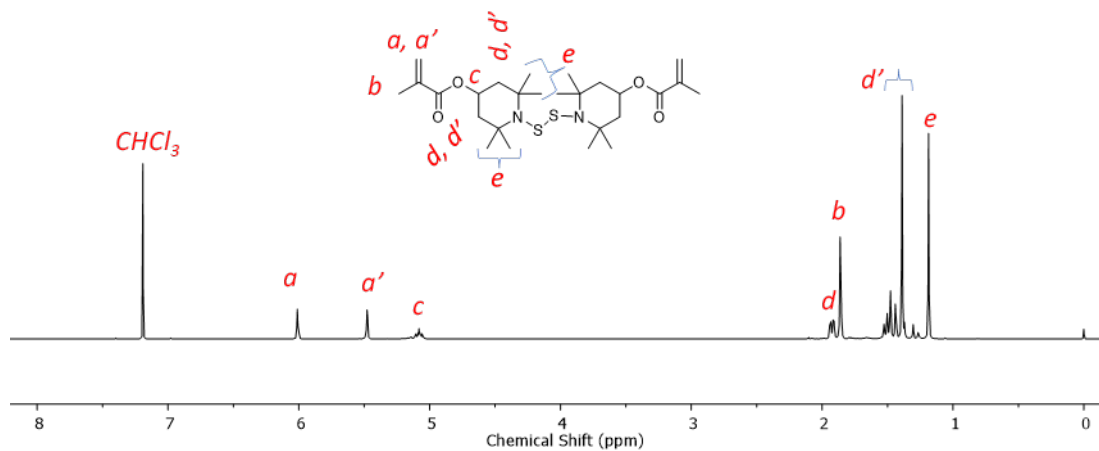

**Figure S3.** <sup>1</sup>H NMR (CDCl<sub>3</sub>, 500 MHz) of crude BTMA-S2 synthesized in dry DCM at -70 °C.

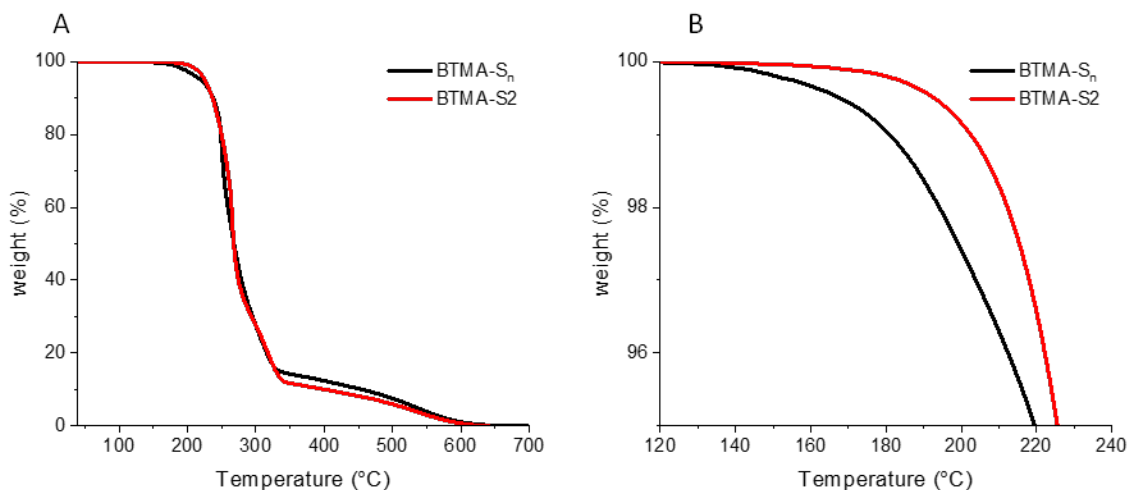

**Figure S4.** TGA thermogram of BTMA-S<sub>n</sub> and BTMA-S<sub>2</sub>: A) normalized weight as a function of temperature from 40 °C to 700 °C. B) Normalized weight from 100 % to 95 % as a function of temperature from 120 °C to 240 °C.

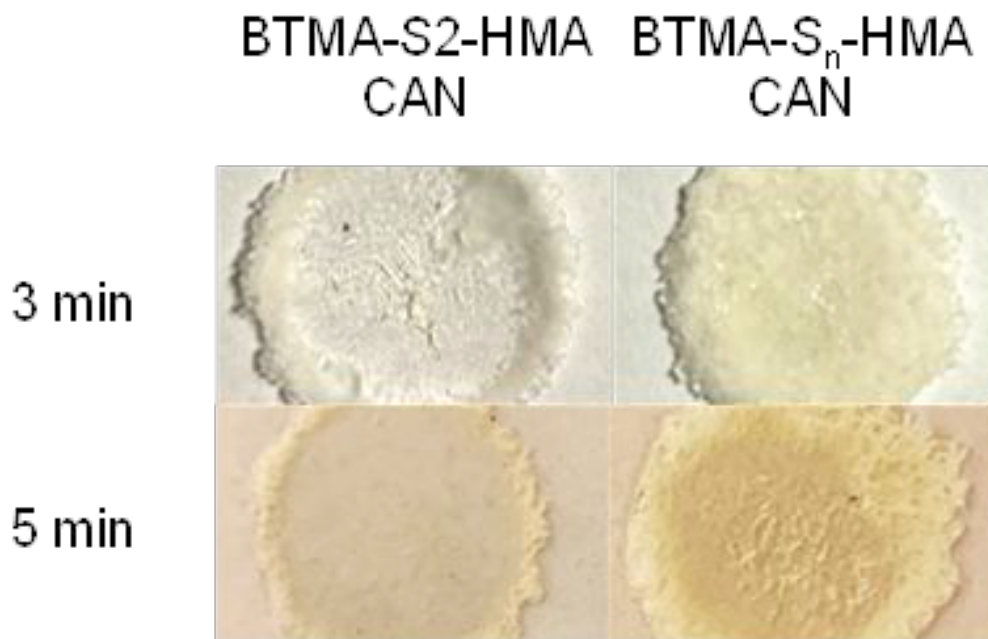

**Figure S5.** Images of compression-molded samples of BTMA-S<sub>2</sub>-HMA CAN and BTMA-S<sub>n</sub>-HMA CAN at 130 °C and 10 MPa after 3 min and 5 min.

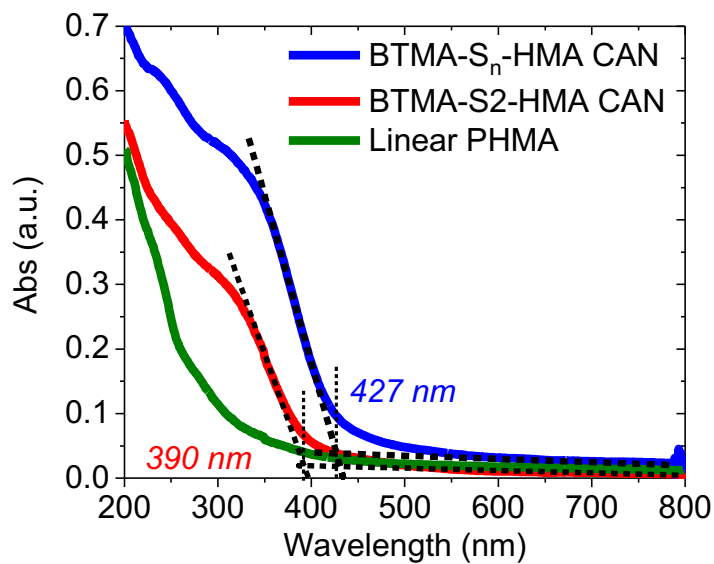

**Figure S6.** UV-Vis diffuse reflectance spectroscopy of BTMA-S<sub>2</sub>-HMA CAN and BTMA-S<sub>n</sub>-HMA CAN materials.

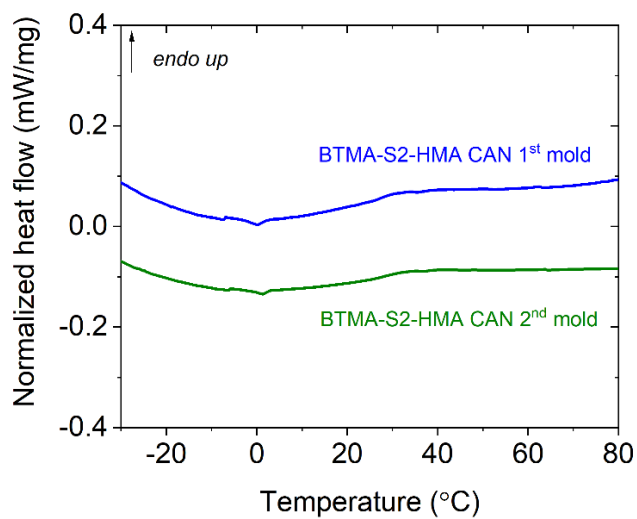

**Figure S7.** DSC thermograms of 1<sup>st</sup> and 2<sup>nd</sup> compression molded BTMA-S<sub>2</sub>-HMA CAN.

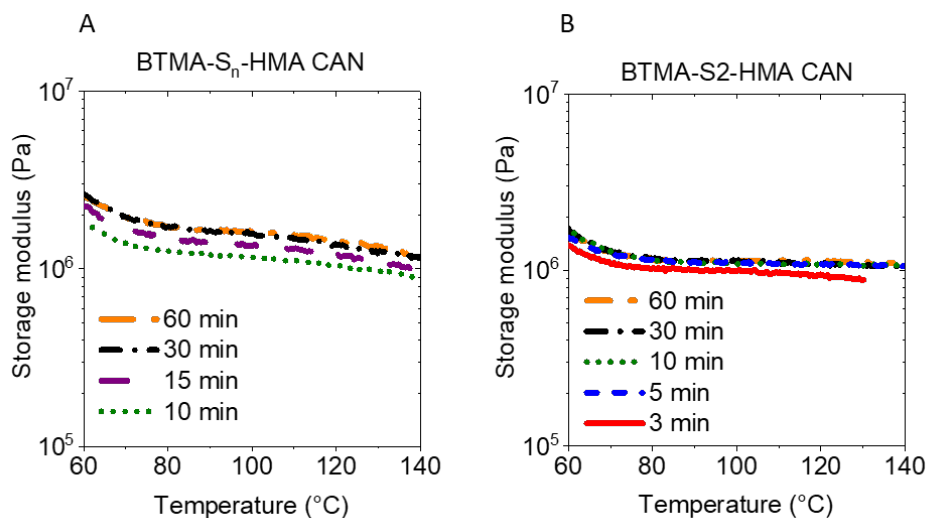

**Figure S8.** Storage modulus (in log scale) as a function of temperature of samples compression molded at different times: A) BTMA-S<sub>n</sub>-HMA CAN and B) BTMA-S2-HMA CAN.

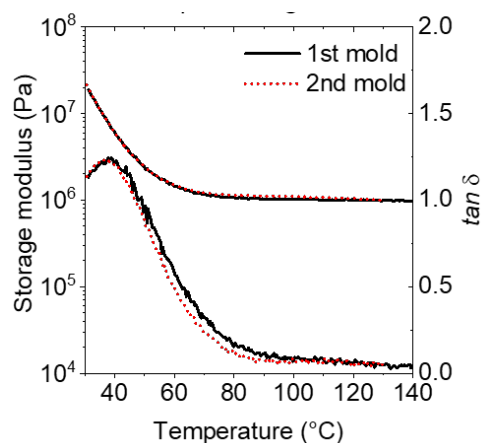

**Figure S9.** Storage modulus as a function of temperature for the 1<sup>st</sup> and 2<sup>nd</sup> reprocessed BTMA-S2-HMA CAN samples obtained after compression molding at 130  $^{\circ}\text{C}$  for 5 min.

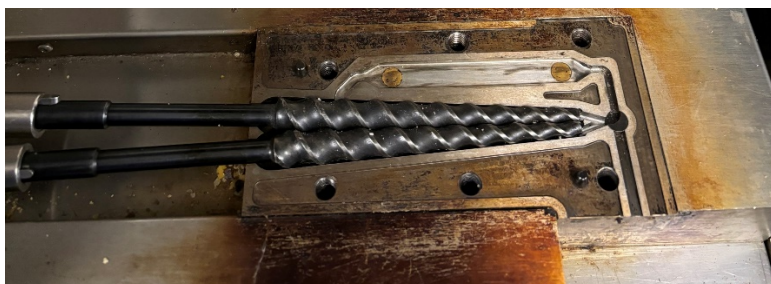

**Figure S10.** Image of twin-screw extruder instrument used in this study (Thermo Scientific Haake MiniLab 3)

**Table S1.** Storage modulus ( $E'$ ) as a function of temperature for reprocessed BTMA-S2-HMA CAN and BTMA-S<sub>n</sub>-HMA CAN samples obtained from compression molding at 130 °C for 60 min.

| $E'$ (MPa)                                             | 90 °C          | 100 °C         | 110 °C         | 120 °C         | 130 °C         | 140 °C         |
|--------------------------------------------------------|----------------|----------------|----------------|----------------|----------------|----------------|
| BTMA-S <sub>n</sub> -HMA CAN<br>(1 <sup>st</sup> mold) | 1.66 ±<br>0.12 | 1.62 ±<br>0.04 | 1.56 ±<br>0.06 | 1.48 ±<br>0.03 | 1.33 ±<br>0.07 | 1.23 ±<br>0.10 |
| BTMA-S <sub>n</sub> -HMA CAN<br>(2 <sup>nd</sup> mold) | 1.68 ±<br>0.12 | 1.66 ±<br>0.07 | 1.57 ±<br>0.03 | 1.52 ±<br>0.12 | 1.38 ±<br>0.09 | 1.28 ±<br>0.09 |
| BTMA-S2-HMA CAN<br>(1 <sup>st</sup> mold)              | 1.11 ±<br>0.05 | 1.11 ±<br>0.04 | 1.12 ±<br>0.08 | 1.12 ±<br>0.09 | 1.10 ±<br>0.06 | 1.08 ±<br>0.10 |
| BTMA-S2-HMA CAN<br>(2 <sup>nd</sup> mold)              | 1.09 ±<br>0.06 | 1.10 ±<br>0.11 | 1.10 ±<br>0.14 | 1.11 ±<br>0.09 | 1.10 ±<br>0.03 | 1.07 ±<br>0.10 |
| BTMA-S2-HMA CAN<br>(extrudate)                         | 1.11 ±<br>0.05 | 1.11 ±<br>0.04 | 1.14 ±<br>0.08 | 1.18 ±<br>0.09 | 1.20 ±<br>0.06 | 1.25 ±<br>0.10 |

**Table S2.** Characteristic relaxation times ( $\tau^*$ ), stretching exponent ( $\beta$ ), average relaxation times ( $\langle\tau\rangle$ ), and Arrhenius activation energy ( $E_a$ ) values from stress relaxation measurements of 1<sup>st</sup> compression molded samples of BTMA-S2-HMA CAN and BTMA-S<sub>n</sub>-HMA CAN materials at different temperatures.

| Sample                          | $T$<br>(°C) | $\tau^*$<br>(s) | $\beta$ | $\langle\tau\rangle$<br>(s) | $R^2$ | $E_a$<br>(kJ/mol) | $R^2$ |
|---------------------------------|-------------|-----------------|---------|-----------------------------|-------|-------------------|-------|
| BTMA-S2-HMA<br>CAN              | 130         | 128             | 0.79    | 146                         | 0.999 | 102 ± 4           | 0.999 |
|                                 | 140         | 57              | 0.79    | 65                          | 0.989 |                   |       |
|                                 | 150         | 29              | 0.82    | 32                          | 0.997 |                   |       |
|                                 | 160         | 15              | 0.81    | 16                          | 0.998 |                   |       |
| BTMA-S <sub>n</sub> -HMA<br>CAN | 120         | 1090            | 0.72    | 1350                        | 0.999 | 107 ± 3           | 0.997 |
|                                 | 130         | 422             | 0.73    | 514                         | 0.998 |                   |       |
|                                 | 140         | 168             | 0.79    | 192                         | 0.997 |                   |       |
|                                 | 150         | 62              | 0.91    | 67                          | 0.997 |                   |       |
